# Supplementary material for: Estimating geological CO2 storage security to deliver on climate mitigation
Source: PubMed Central journal article supplement (PMC5997736; doi:10.1038/s41467-018-04423-1), 2018-06-12
Supplement: 41467_2018_4423_MOESM2_ESM.pdf [file 41467_2018_4423_MOESM2_ESM.pdf]

## Description of Additional Supplementary Files

**File Name:** Supplementary Data 1

**Description:** Storage Security Calculator R-code.
